# Supplementary material for: ADGRL1 is a glucose receptor involved in mediating energy and glucose homeostasis
Source: PubMed Central journal article supplement (PMC10709246; doi:10.1007/s00125-023-06010-6), 2023-09-15
Supplement: 125_2023_6010_MOESM1_ESM.pdf [file 125_2023_6010_MOESM1_ESM.pdf]

ESM Figures

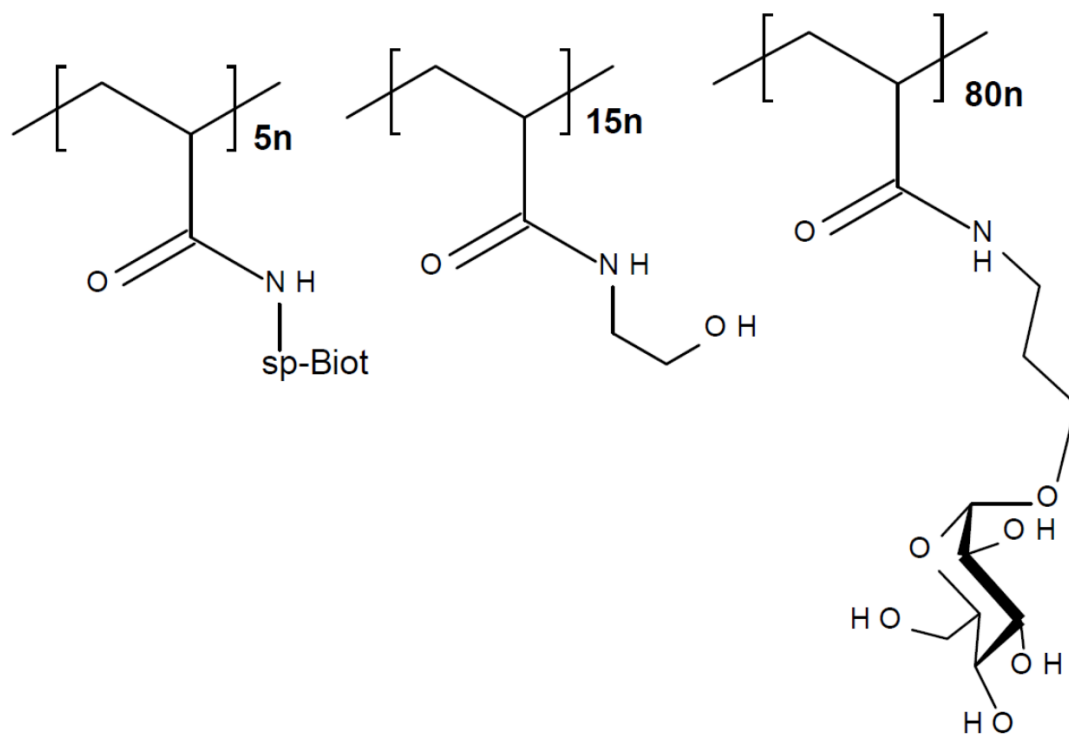

**ESM Fig. 1** Structure of 30 KDa multivalent biotinylated glucose. Glucose is incorporated into a polyacrylamide matrix with 80 mol% glucose, 15 mol% polyacrylamide, and 5 mol% biotin. sp, spacer; n, number of units linked together.

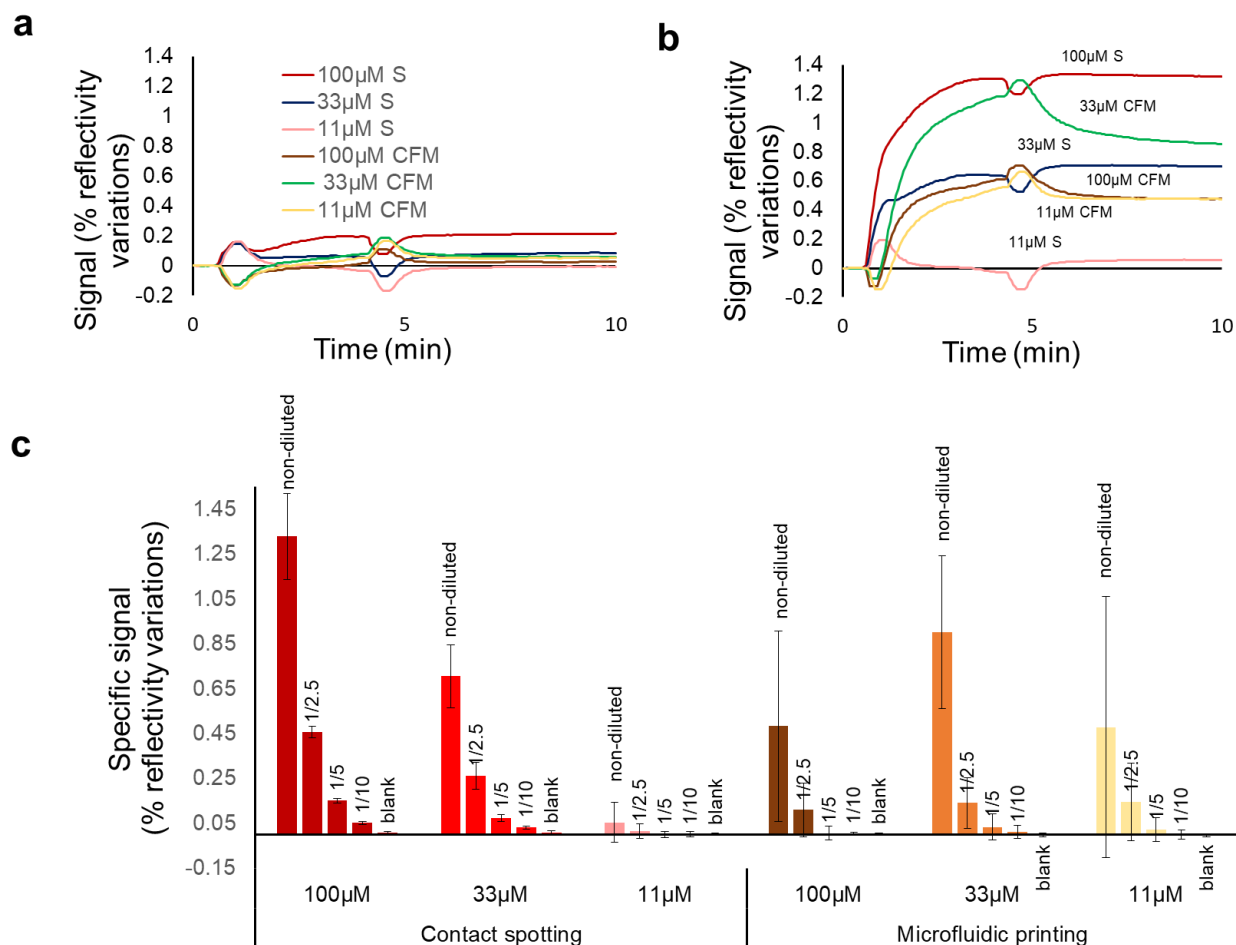

**ESM Fig. 2** Optimization of surface plasmon resonance imaging method to measure glucose- human ADGRL1 binding. **(a)** Surface plasmon resonance imaging (SPRi) responses obtained from interaction between difference concentrations ( $\mu$ M,  $\mu$ mol/l) of biotinylated glucose conjugate and control cells (without ADGRL1) on two different immobilization systems: SPRi-Arrayer (micro-array format, S) and SPRi-CFM (continuous flow microspotter). **(b)** SPRi signal obtained from interaction between different concentrations ( $\mu$ M, concentration in  $\mu$ mol/l) of biotinylated glucose conjugate and ADGRL1 stably expressed in CHO cells on the two immobilization systems. **(c)** Dose dependent response obtained from interaction between different concentrations ( $\mu$ M, concentration in  $\mu$ mol/l) of biotinylated glucose and the ADGRL1 expressing CHO cells to select optimal conditions for downstream studying of glucose-ADGRL1 kinetics. These responses were normalized to the signals obtained with the biotinylated control conjugate without glucose. Non-diluted refers to  $5 \times 10^5$  cells/ml, which were then serially diluted 1/2.5, 1/5, 1/10 and 0 cells to produce a dose-dependent response. S, contact spotting by SPRi-Arrayer; CFM, continuous flow microspotter.

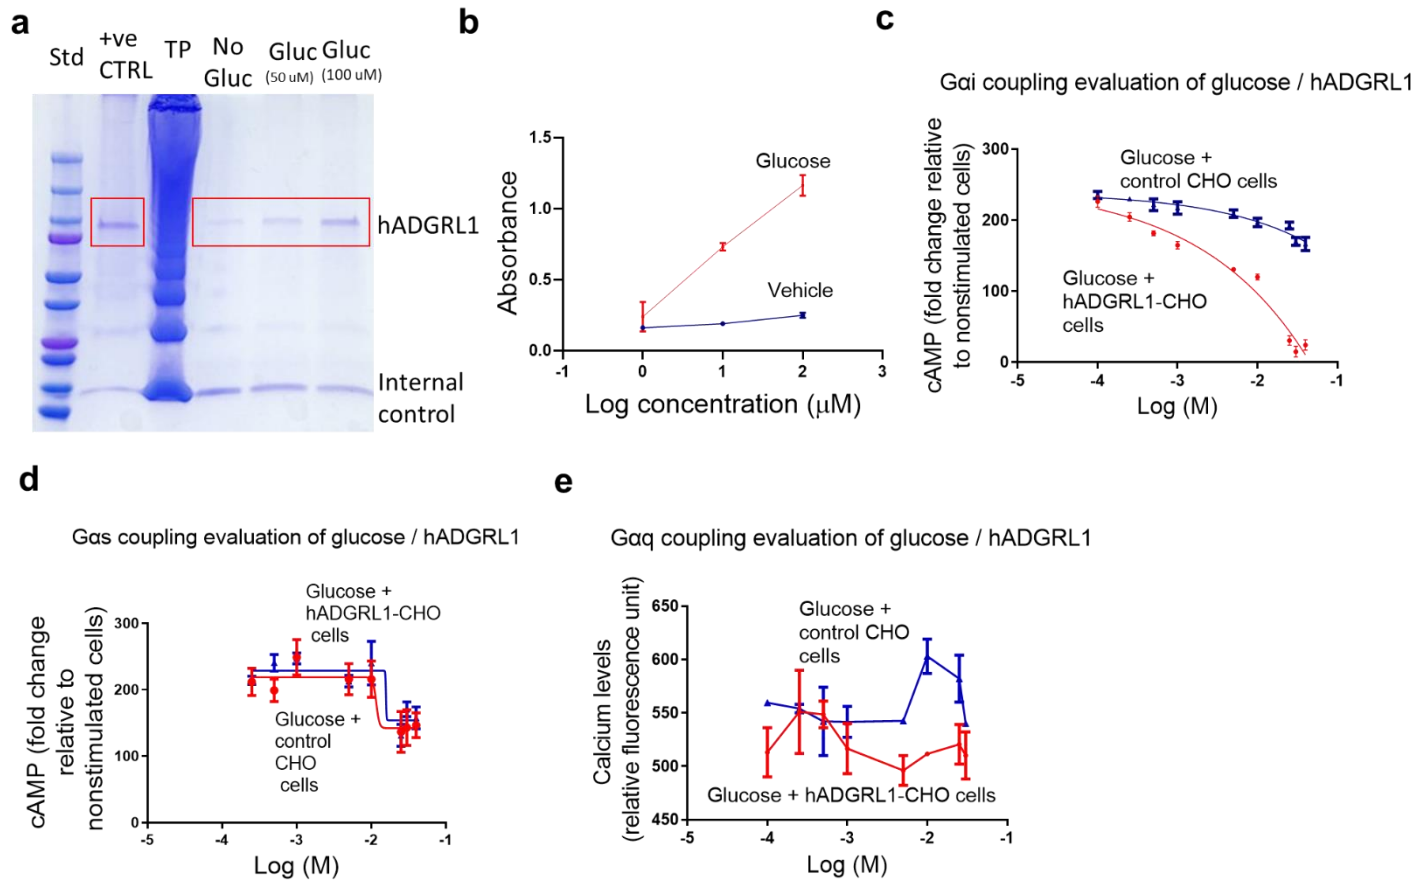

**ESM Fig. 3** Regular (non-conjugated) glucose binds with recombinant human ADGRL1. (a) Gel electrophoresis and (b) Colorimetry. Glucose dose-dependently decreases cAMP in Gai coupling assay (c) but not in Gas coupling assay (d). Glucose doesn't change calcium levels in Gas coupling assay (e), the assays were performed in duplicates. Std, standard protein ladder; +ve CTRL, recombinant human ADGRL1; TP, total protein left after purifying recombinant human ADGRL1; No Gluc, PBS (no glucose) + human ADGRL1 in Laemmli sample buffer; Gluc, glucose (regular non-conjugated) immobilized on epoxy-activated 96-plate wells + human ADGRL1 in Laemmli sample buffer; internal control, avidin; hADGRL1-CHO cells, stable CHO cells expressing human ADGRL1.

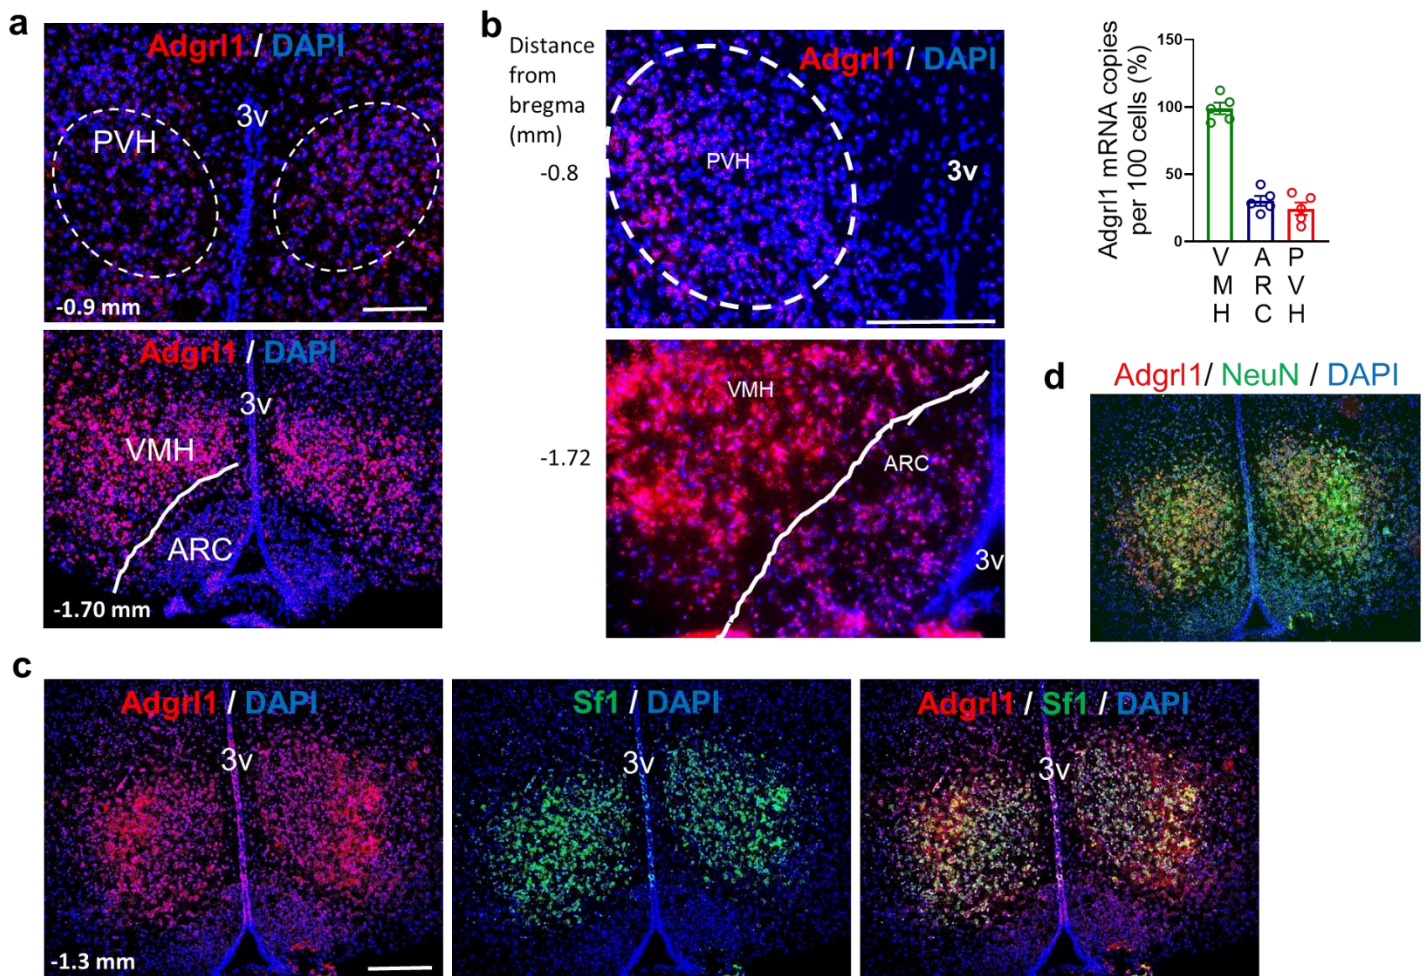

**ESM Fig. 4** *Adgrl1* is highly expressed in the ventromedial nucleus of the hypothalamus. **(a)** Images from RNA in situ hybridization procedure demonstrating *Adgrl1* expression in the paraventricular (PVH), ventromedial (VMH), arcuate (ARC) nuclei of the hypothalamus, -0.9 and -1.70 mm are distances relative to the bregma. **(b)** 200x magnification of RNA in situ hybridization images of *Adgrl1* staining in the PVH, VMH, and ARC of the hypothalamus. Quantification of the staining is shown on the right, n= 4 sections per mouse were analyzed from 5 different mice. **(c, d)** Co-localization of *Adgrl1* with the VMH marker steroidogenic factor 1 (Sf1) and neuronal marker neuronal nuclei (NeuN), -1.3 mm is distance relative to the bregma. AP, anterior-posterior; ML, medial-lateral; DV, dorsal-ventral. Scale, 100  $\mu$ m

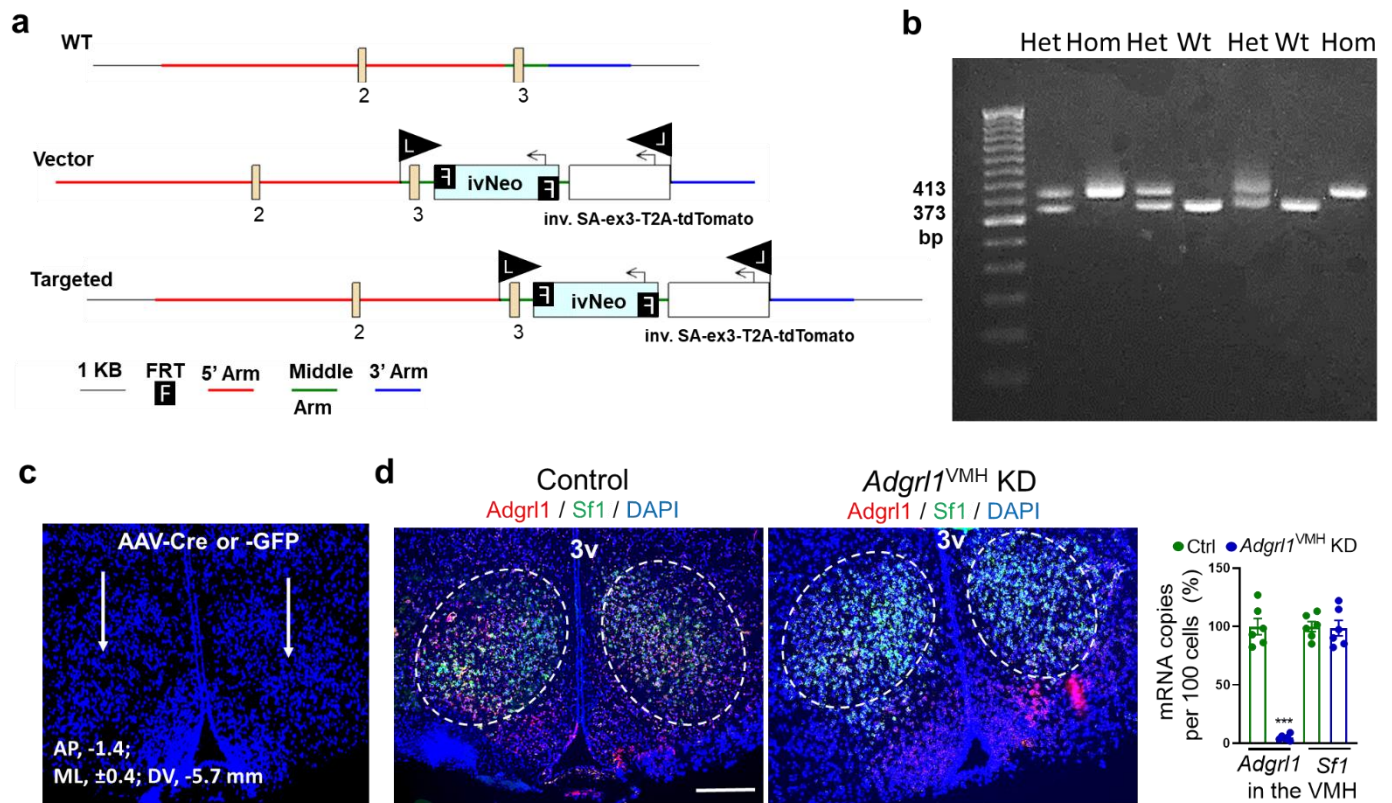

**ESM Fig. 5** (a) Schematic diagram showing design of the vector that was used to produce floxed *Adgrl1* mice. (b) Representative genotypes of mice used in this study to produce *Adgrl1*<sup>loxP/loxP</sup> homozygous (Hom, 413 bp band) mice. WT band is observed at 373 bp and bands at both the sizes indicated heterozygous (Het) mice. (c) Image shows the stereotaxic coordinates - relative to the bregma - we had used to inject adeno-associated viral (AAV) vector expressing Cre or GFP to induce deficiency of *Adgrl1* specifically in the ventromedial nucleus of the hypothalamus (VMH). (d) Quantification of *Adgrl1* knockdown in the VMH (*Adgrl1*<sup>VMH</sup> KD) after AAV-Cre injections, n=3 sections per mouse were analyzed at the end of the study (24 weeks after inducing the *Adgrl1* deficiency). The VMH area shown in white dotted circles was used for the quantification. Steroidogenic factor (*Sf1*) is a marker of the VMH and was used as an internal control. Two-tailed Unpaired Student's t-test, \*\*\*p<0.001.

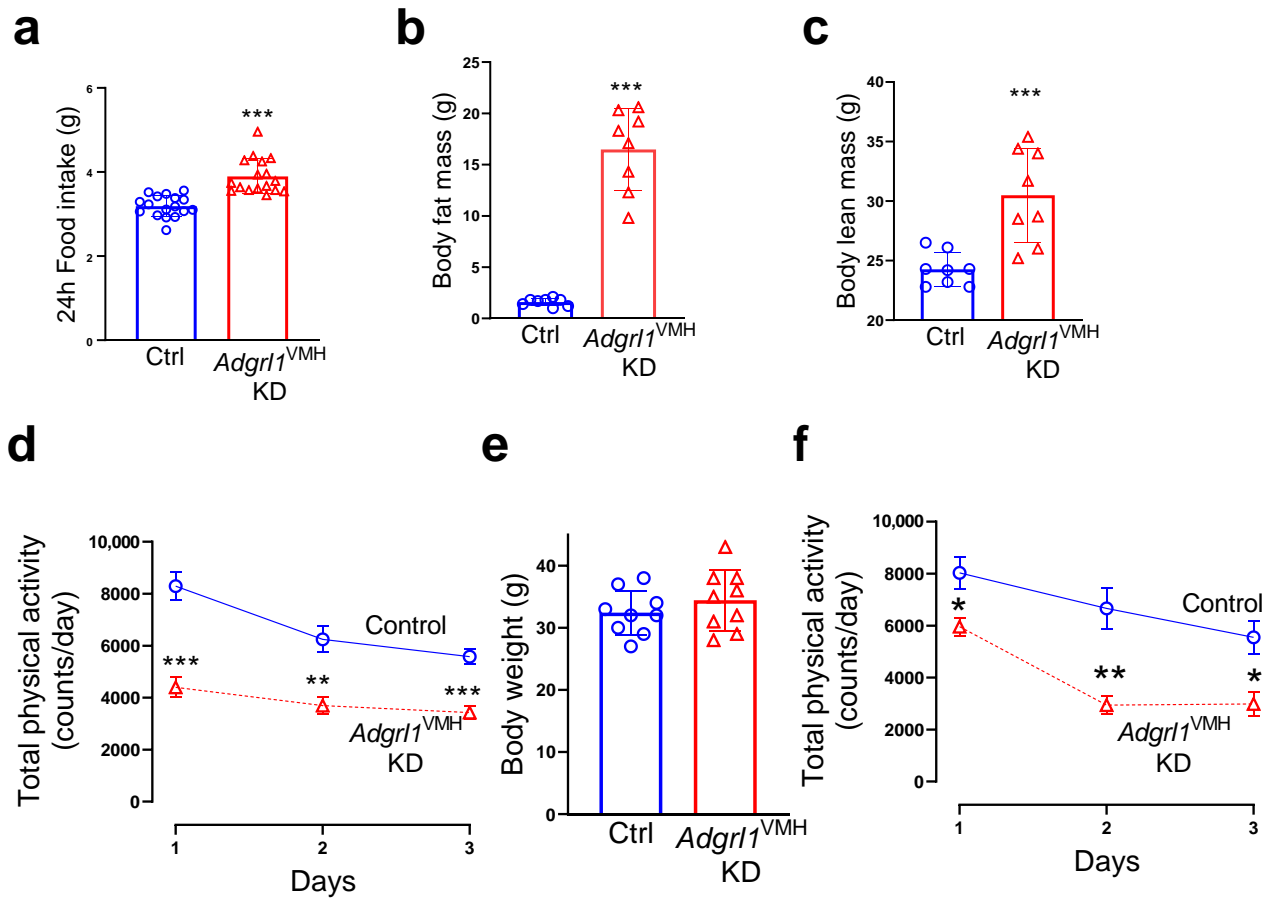

**ESM Fig. 6** (a) Food intake,  $n=17$  Ctrl and *Adgr1*<sup>VMH</sup> KD mice, (b) Body fat mass, (c) Body lean mass, (d) Total physical activity,  $n=8$  Ctrl and *Adgr1*<sup>VMH</sup> KD mice, on the 21<sup>st</sup> week following *Adgr1*<sup>VMH</sup> knockdown (*Adgr1*<sup>VMH</sup> KD) in 29 weeks old male *Adgr1*<sup>VMH</sup> KD mice and their littermate controls. (e) Bodyweight, (f) Total physical activity in weight-matched mice on the 6<sup>th</sup> week following *Adgr1*<sup>VMH</sup> knockdown in 14 weeks old *Adgr1*<sup>VMH</sup> KD mice and their littermate controls,  $n=9$  Ctrl and *Adgr1*<sup>VMH</sup> KD mice. Two-tailed Student's t-test or repeated measures two-way ANOVA followed by Bonferroni multiple comparison test were used for comparisons. \* $p<0.05$ , \*\* $p<0.01$ , and \*\*\* $p<0.001$ . Data are shown as mean  $\pm$  SEM. Ctrl, Control; *Adgr1*<sup>VMH</sup> KD, *Adgr1* deficiency in the ventromedial nucleus of the hypothalamus.

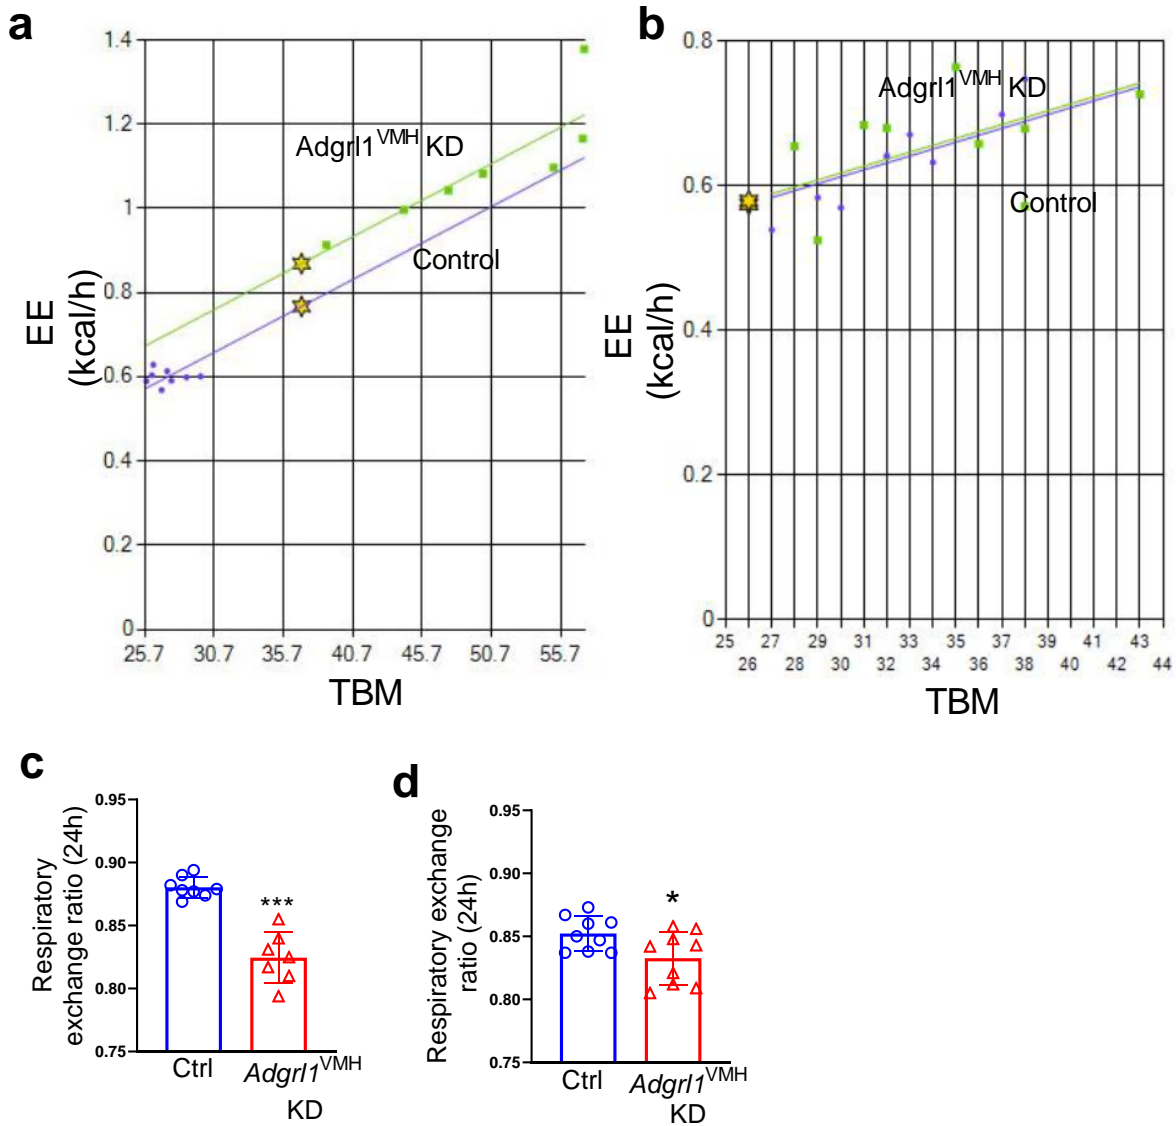

**ESM Fig. 7 Normal energy expenditure in male mice with *Adgrl1* knockdown in the ventromedial nucleus of the hypothalamus (*Adgrl1*<sup>VMH</sup> KD). (a, b) Energy expenditure (EE) analyzed using ANCOVA in obese (a) and weight-matched (b), yellow star represents ANCOVA predicted EE at 37g (a) and 26g (b) total body mass (TBM). (c, d) Respiratory exchange ratio in obese (c) and weight-matched mice (d). Obese mice were analyzed on the 20<sup>th</sup> week following *Adgrl1*<sup>VMH</sup> deficiency in 28 weeks old *Adgrl1*<sup>VMH</sup> KD mice and their littermate controls. n=8 Ctrl and n=7 *Adgrl1*<sup>VMH</sup> KD mice. Weight-matched mice were analyzed on the 6<sup>th</sup> week following *Adgrl1*<sup>VMH</sup> knockdown in 14 weeks old *Adgrl1*<sup>VMH</sup> KD mice and their littermate controls, n=9 Ctrl and *Adgrl1*<sup>VMH</sup> KD mice. Two-tailed Student's t-test was used for comparisons. \*p<0.05 and \*\*p<0.001. Data are shown as mean ± SEM. Ctrl, Control; *Adgrl1*<sup>VMH</sup> KD, *Adgrl1* knockdown in the ventromedial nucleus of the hypothalamus**

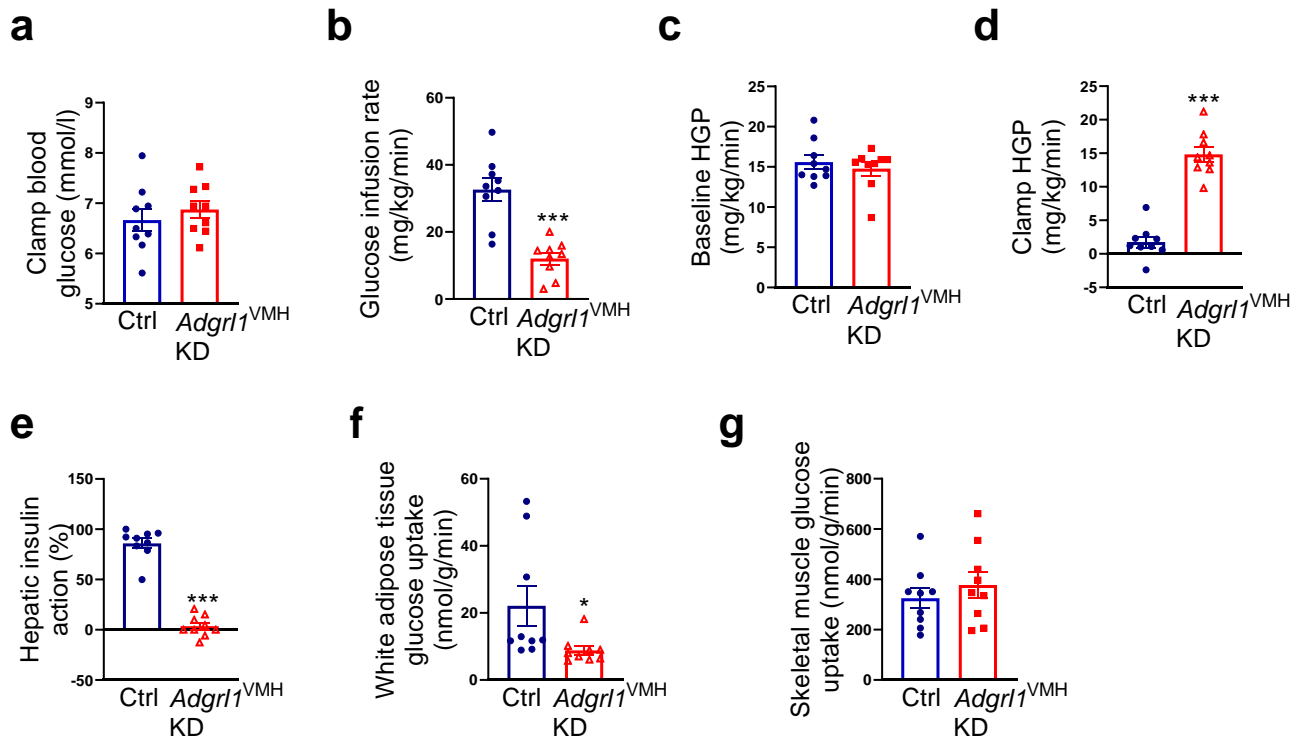

**ESM Fig. 8 Hyperinsulinaemic-euglycaemic clamps in weight-matched male mice with *Adgrl1* knockdown in the ventromedial nucleus of the hypothalamus (*Adgrl1*<sup>VMH</sup> KD).** (a) Clamped blood glucose levels, (b) Glucose infusion rate (GIR), (c,d) Baseline (c) and clamp (d) hepatic glucose production (HGP), (e) Hepatic insulin sensitivity, (f,g) Glucose uptake in adipose tissue (f) and skeletal muscle (g) during hyperinsulinaemic-euglycaemic clamps on the 7<sup>th</sup> week following *Adgrl1*<sup>VMH</sup> deficiency in 15 weeks old *Adgrl1*<sup>VMH</sup> KD mice and their littermate controls, n=9 Ctrl and *Adgrl1*<sup>VMH</sup> KD mice. Two-tailed Student's t-test \*p<0.05 and \*\*\*p<0.001. Data are shown as mean ± SEM. Ctrl, Control littermates; *Adgrl1*<sup>VMH</sup> KD, *Adgrl1* knockdown in the ventromedial nucleus of the hypothalamus.
